# Supplementary material
Source: PubMed Central journal article supplement (PMC2270292)

**Figure S7**

**MUC2 precursor** **DBA ( $\alpha$ D-GalNAc)**

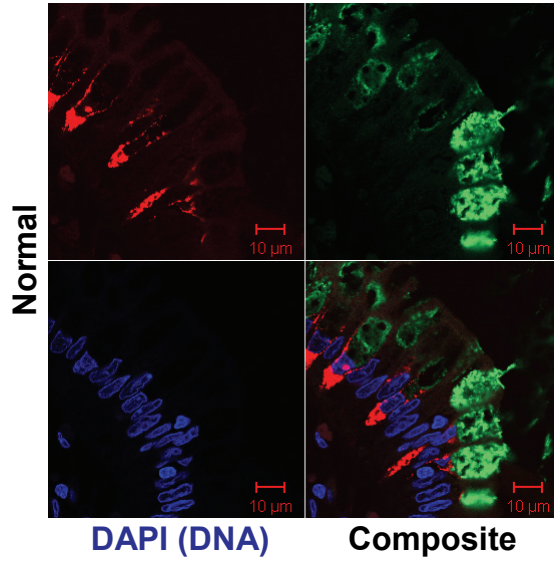

**MUC2 precursor** **DBA ( $\alpha$ D-GalNAc)**

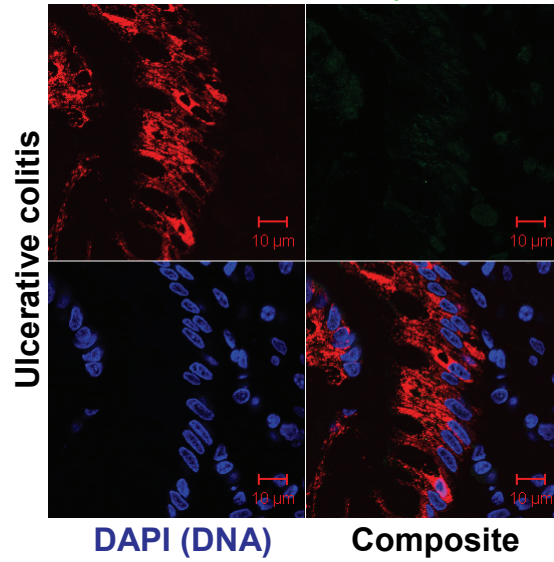

**MUC2 precursor** **DBA ( $\alpha$ D-GalNAc)**

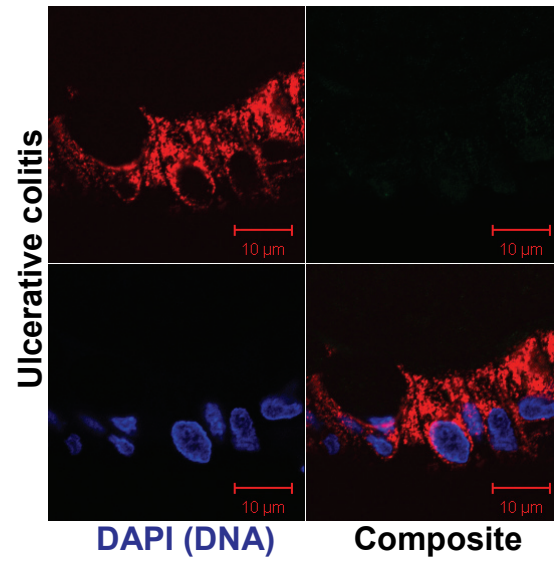

Supplement: pmed.0050054.sg007.pdf [file pmed.0050054.sg007.pdf]
