# Supplementary material
Source: PubMed Central journal article supplement (PMC2270292)

Figure S1

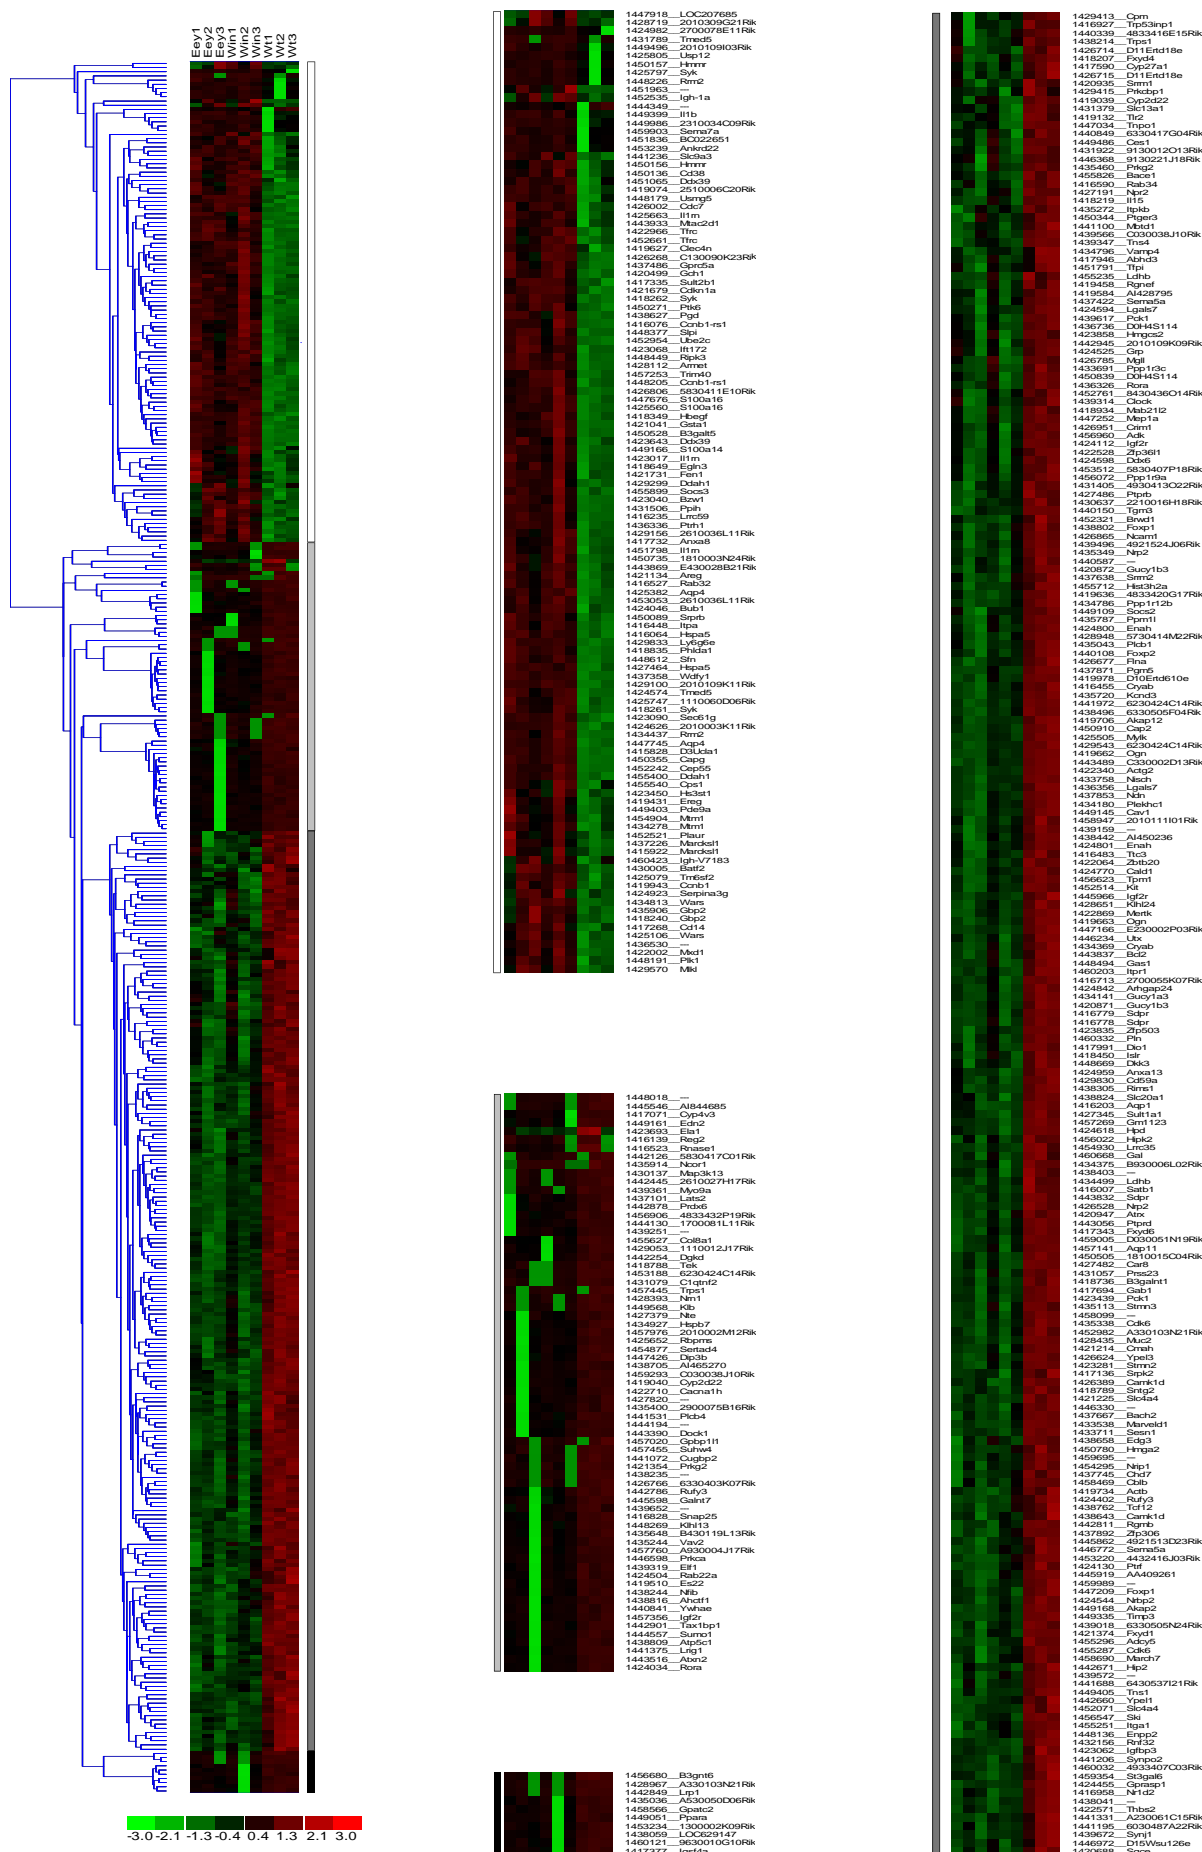

Supplement: pmed.0050054.sg001.pdf [file pmed.0050054.sg001.pdf]

Figure S2

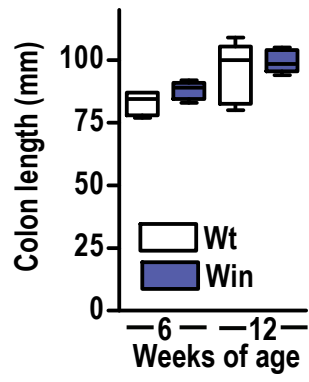

Supplement: pmed.0050054.sg002.pdf [file pmed.0050054.sg002.pdf]

# Figure S3

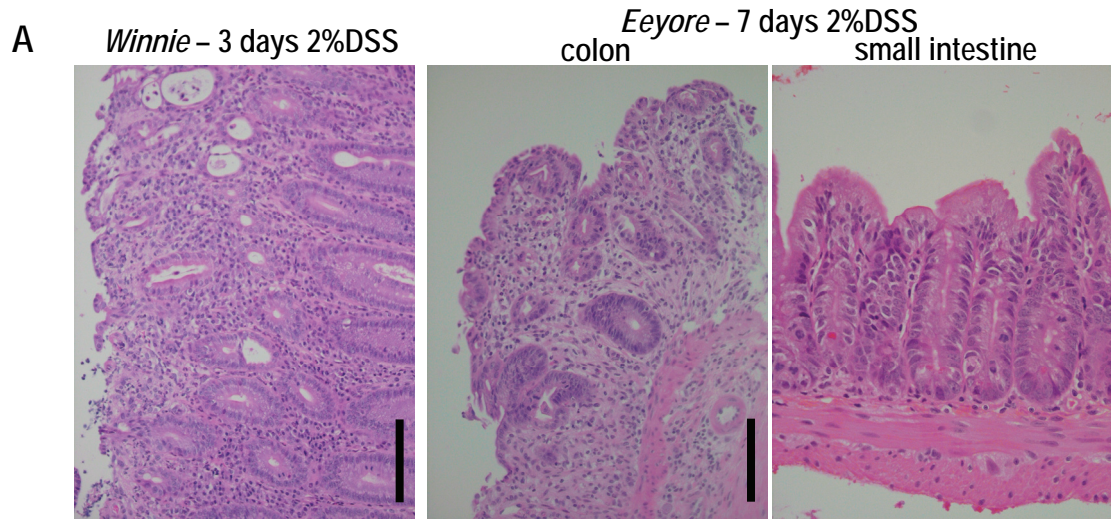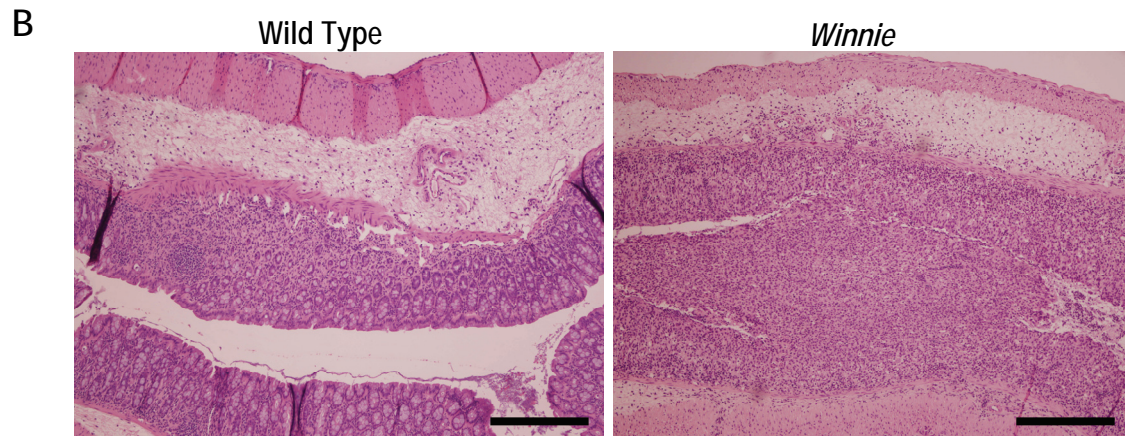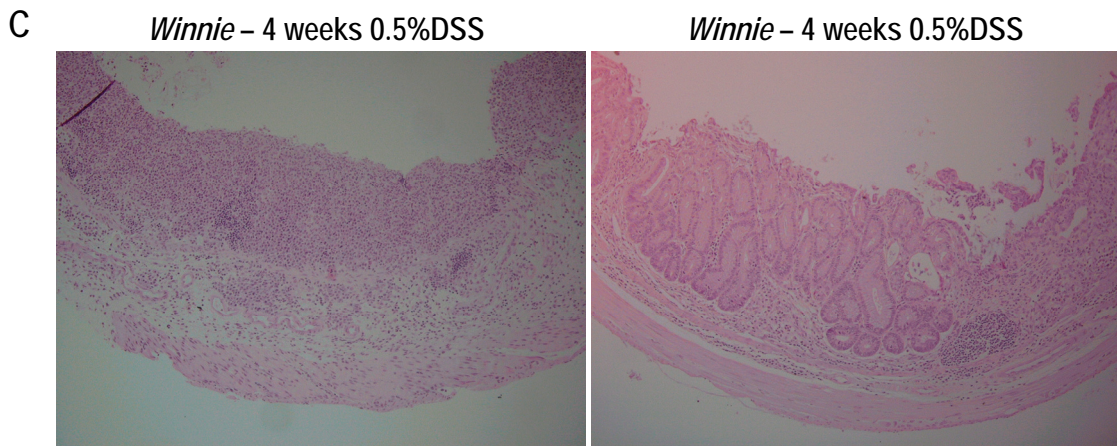

Supplement: pmed.0050054.sg003.pdf [file pmed.0050054.sg003.pdf]

**Figure S4**

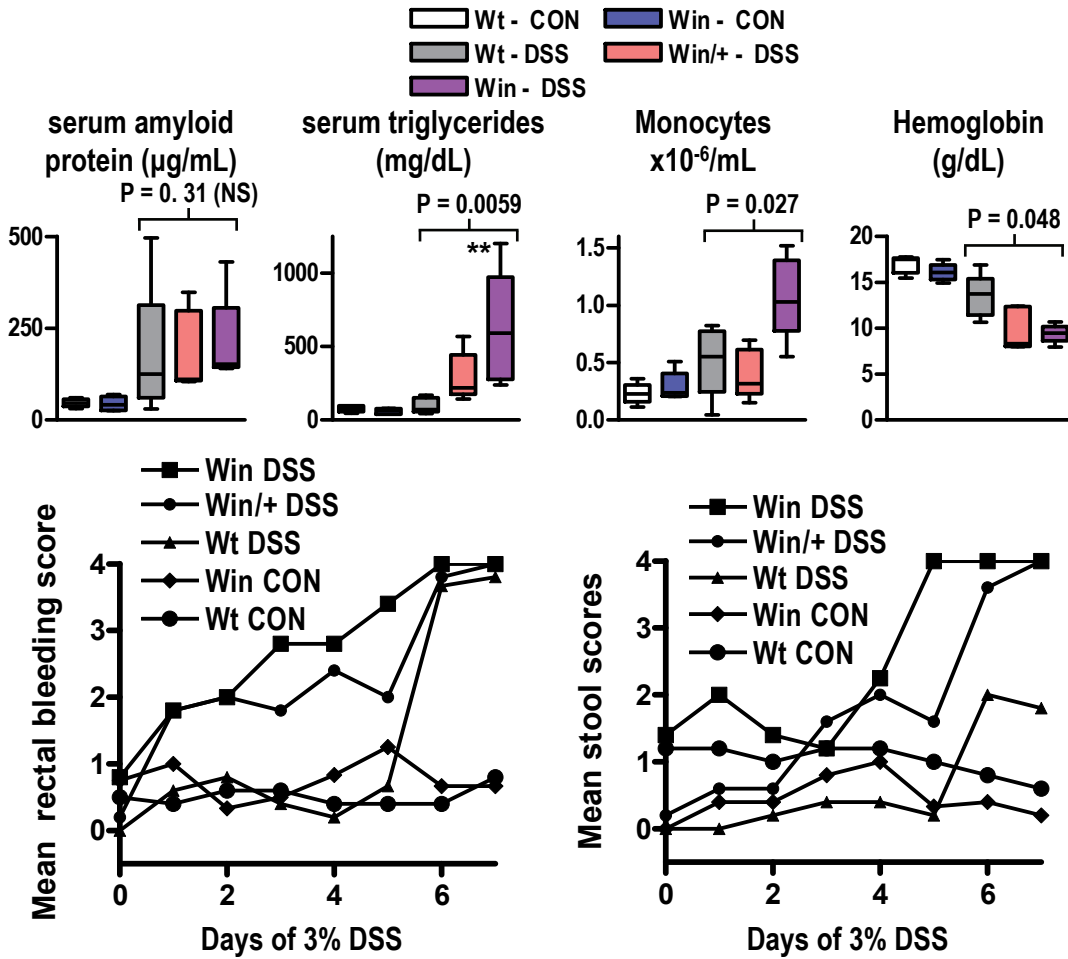

Supplement: pmed.0050054.sg004.pdf [file pmed.0050054.sg004.pdf]

Figure S5

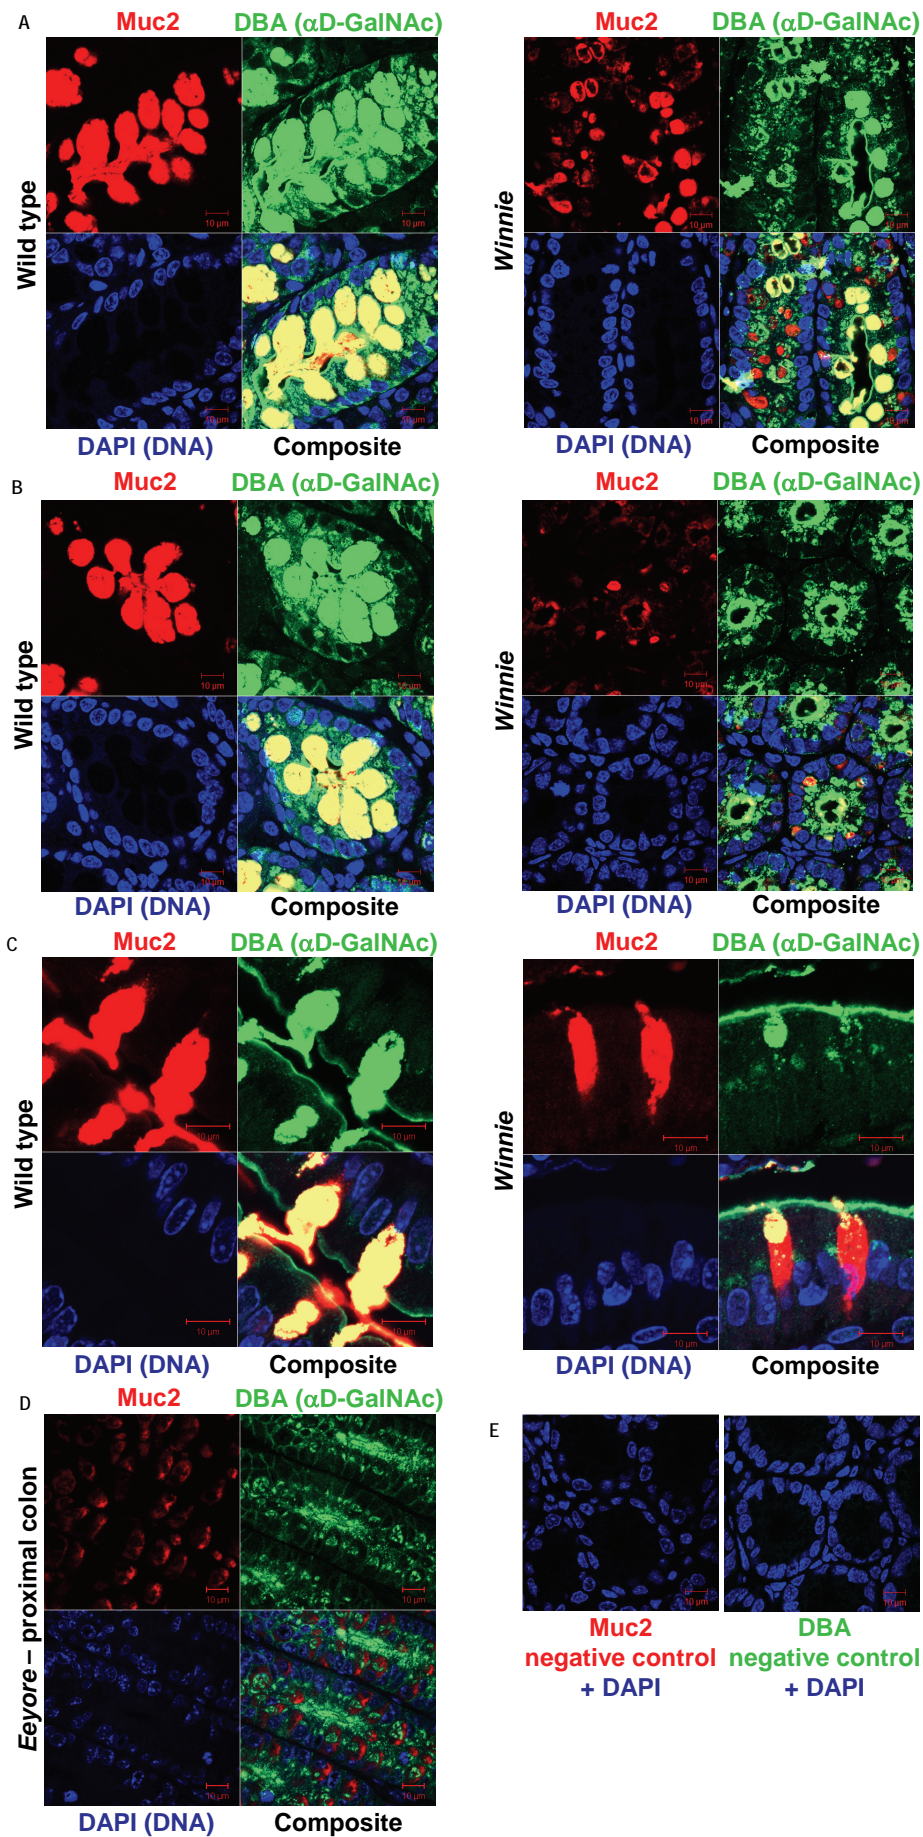

Supplement: pmed.0050054.sg005.pdf [file pmed.0050054.sg005.pdf]

**Figure S6**

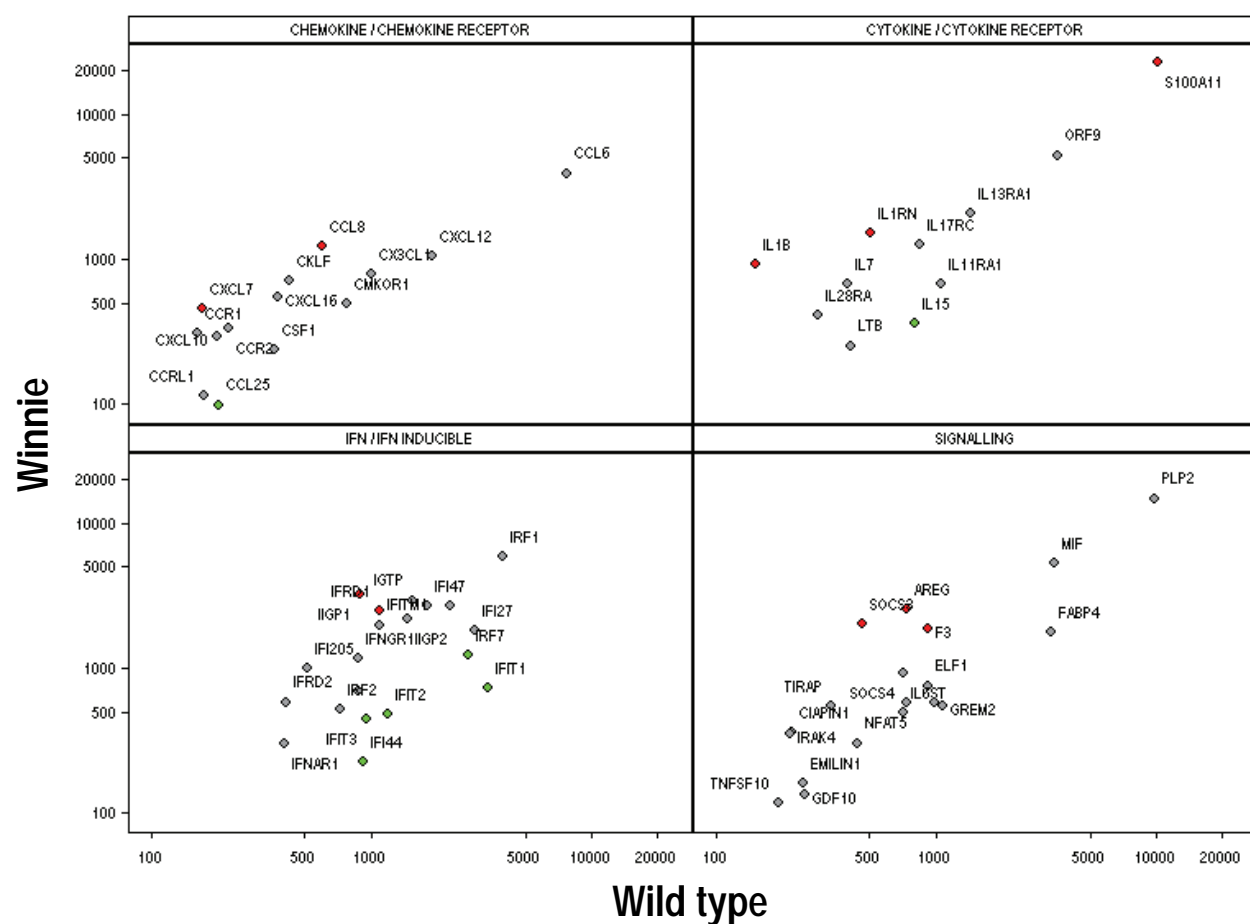

Supplement: pmed.0050054.sg006.pdf [file pmed.0050054.sg006.pdf]

**Figure S8**

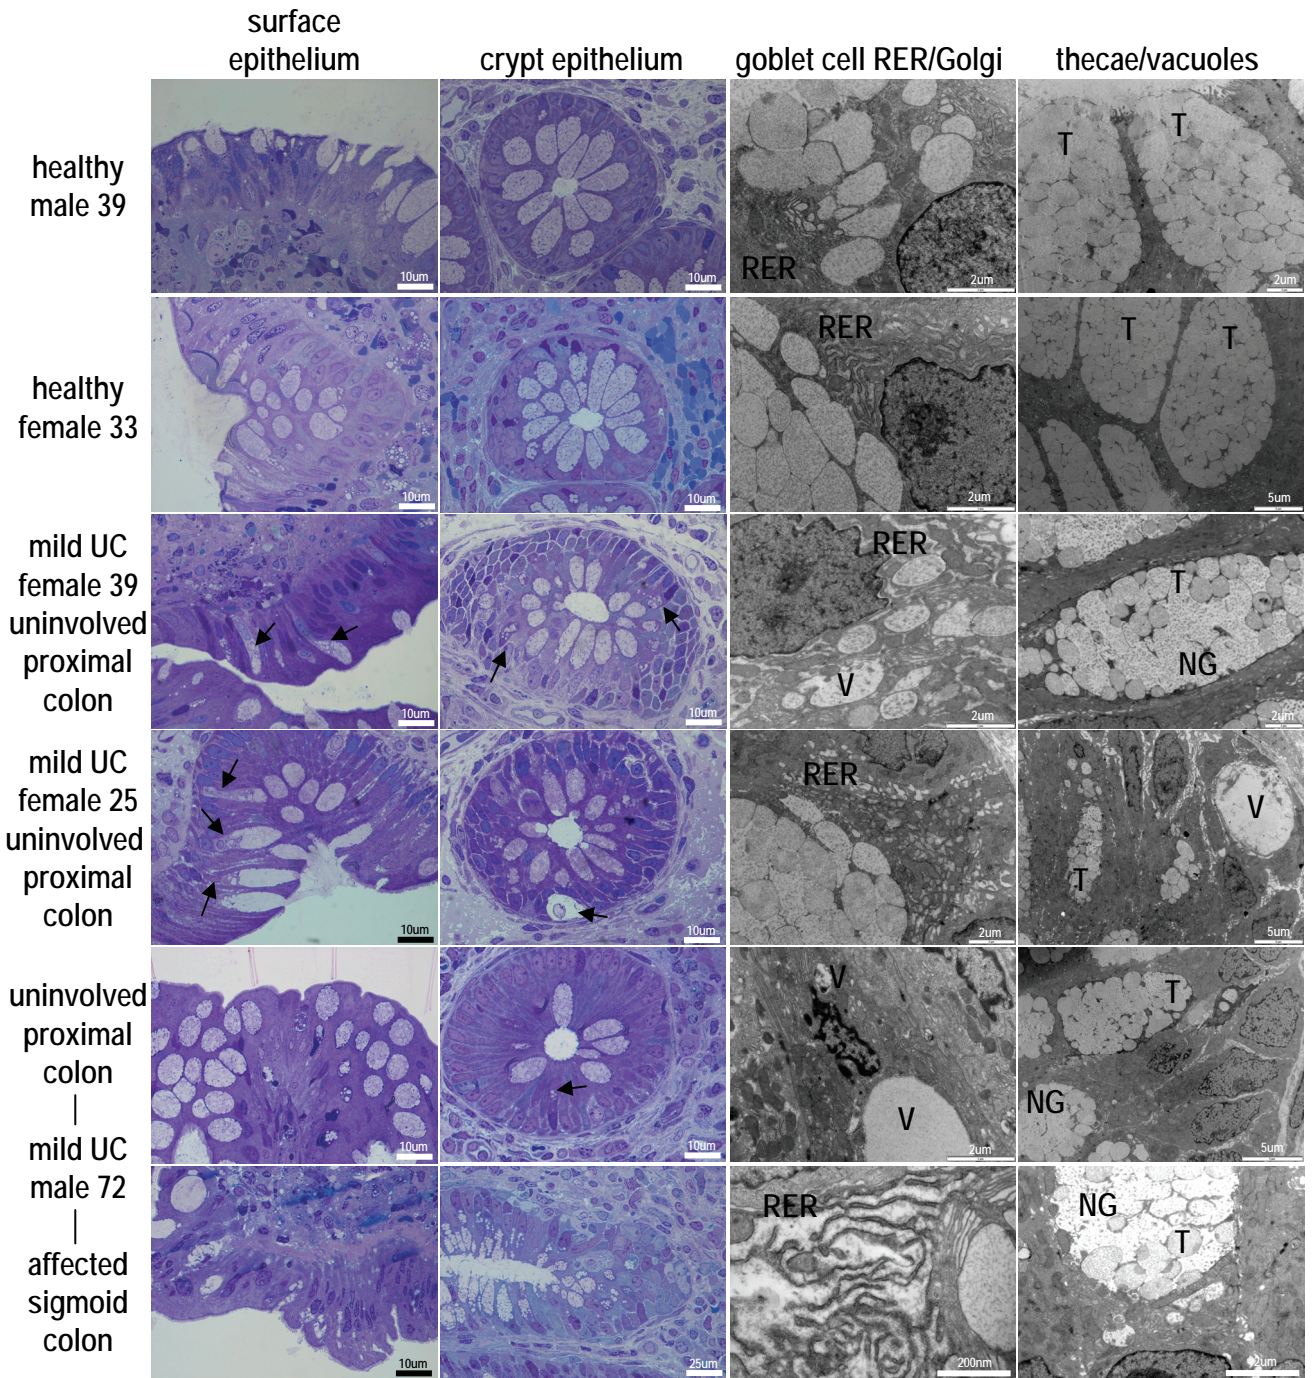

Supplement: pmed.0050054.sg008.pdf [file pmed.0050054.sg008.pdf]
